# Supplementary material
Source: PubMed Central journal article supplement (PMC2898378)
Supplement: supp_M109.084731_jbc.M109.084731-2.pdf [file supp_M109.084731_jbc.M109.084731-2.pdf]

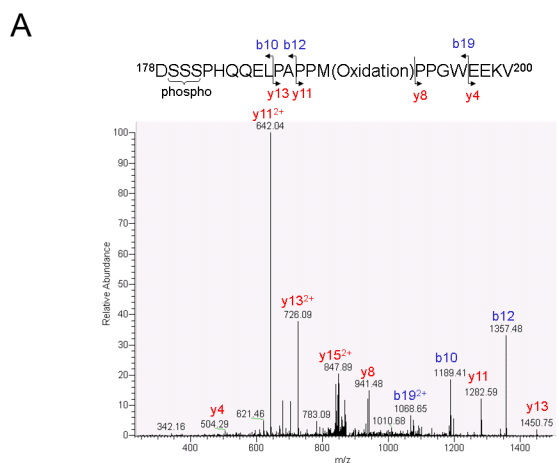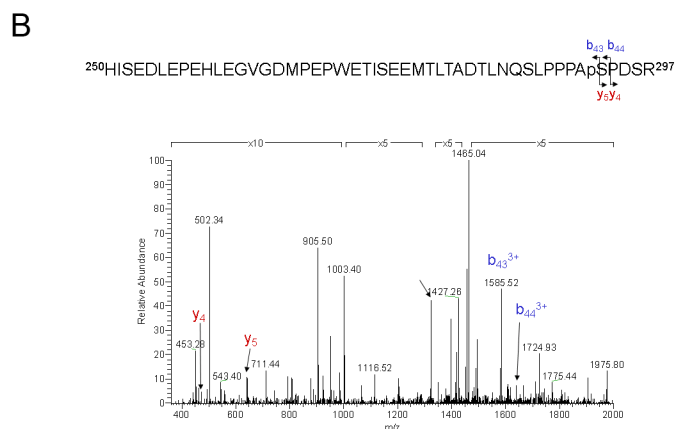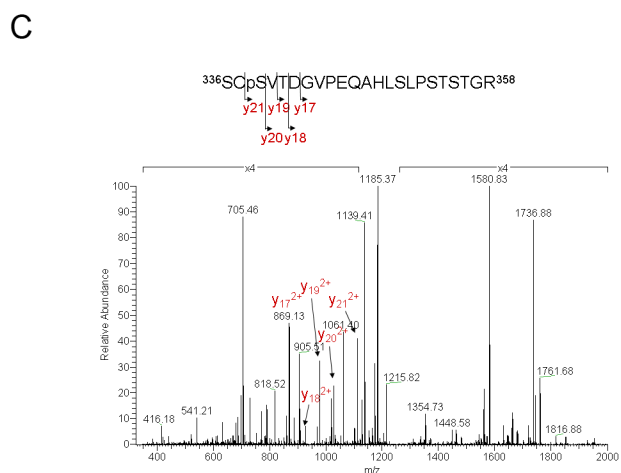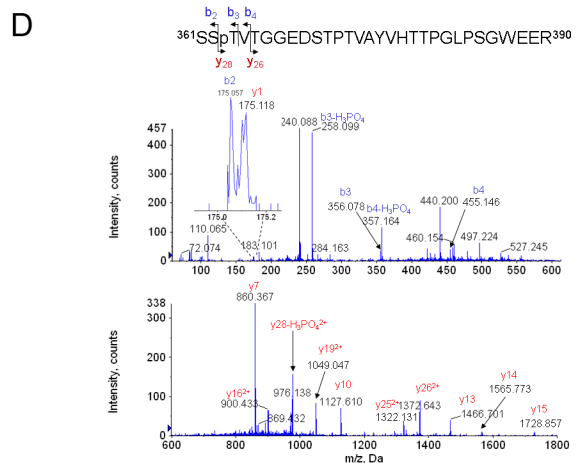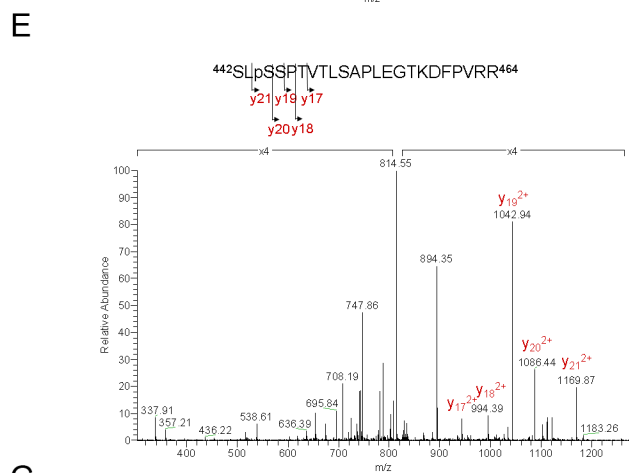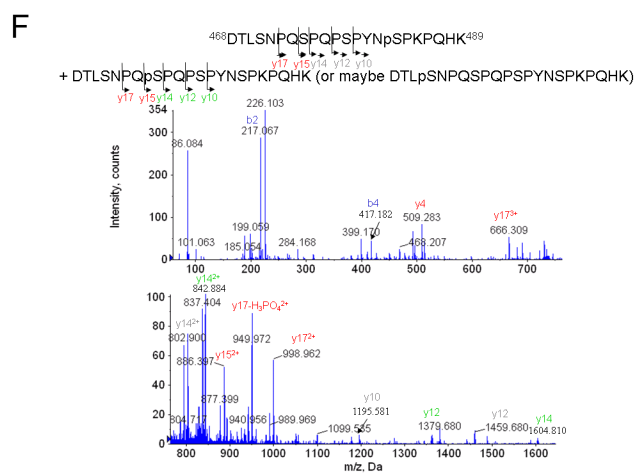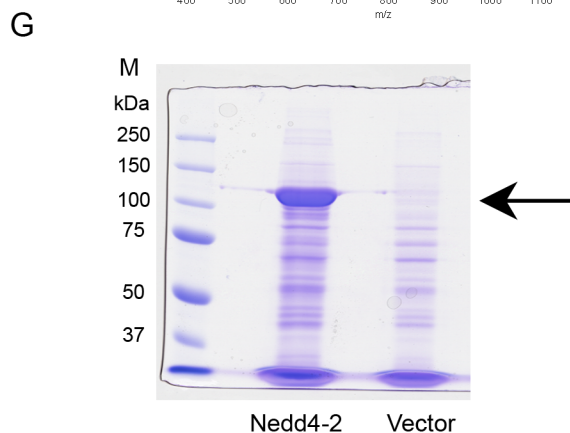

Supplementary Figure 1

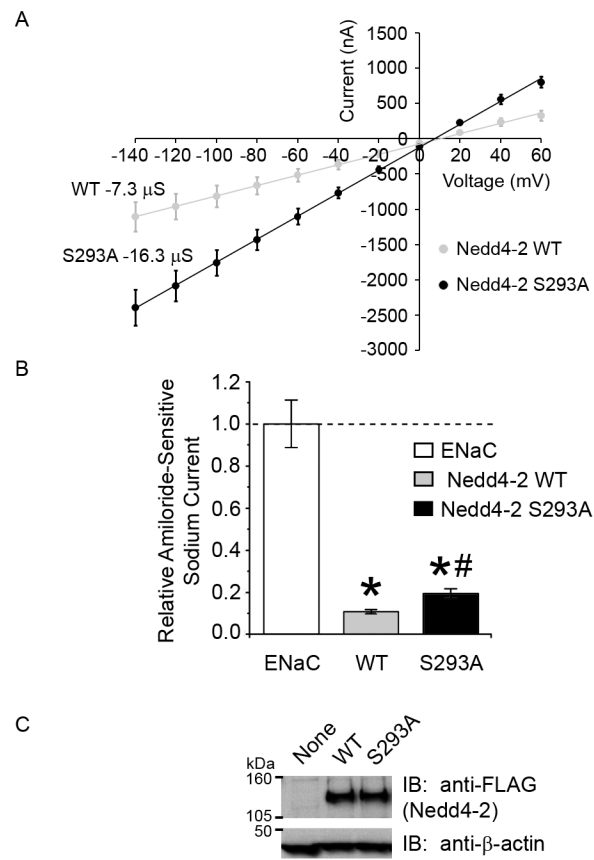

Supplementary Figure 2

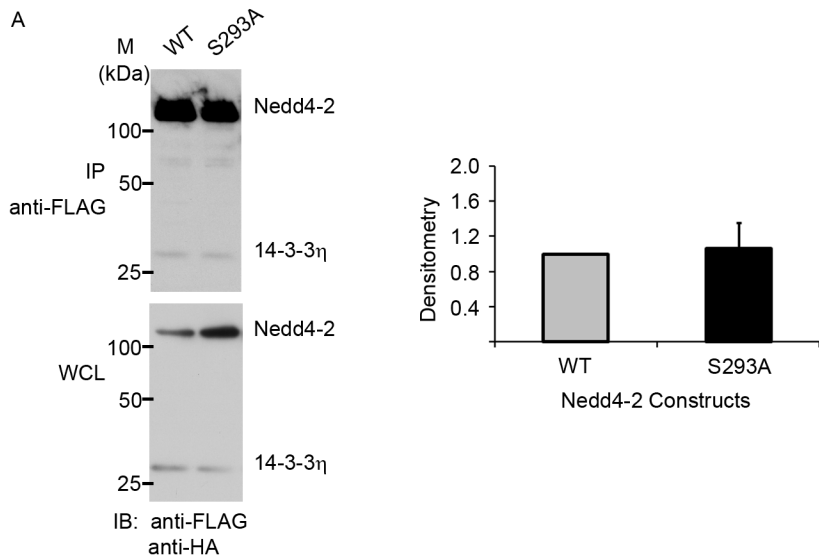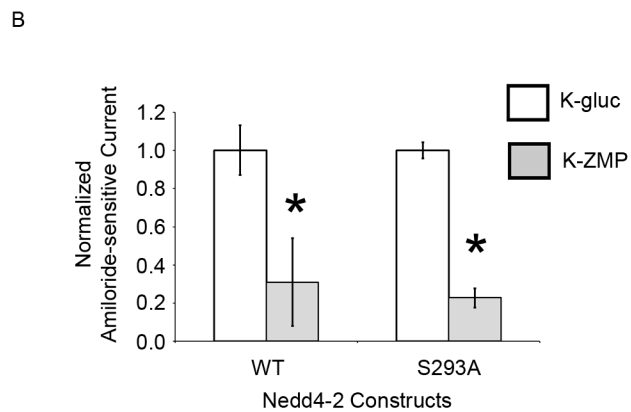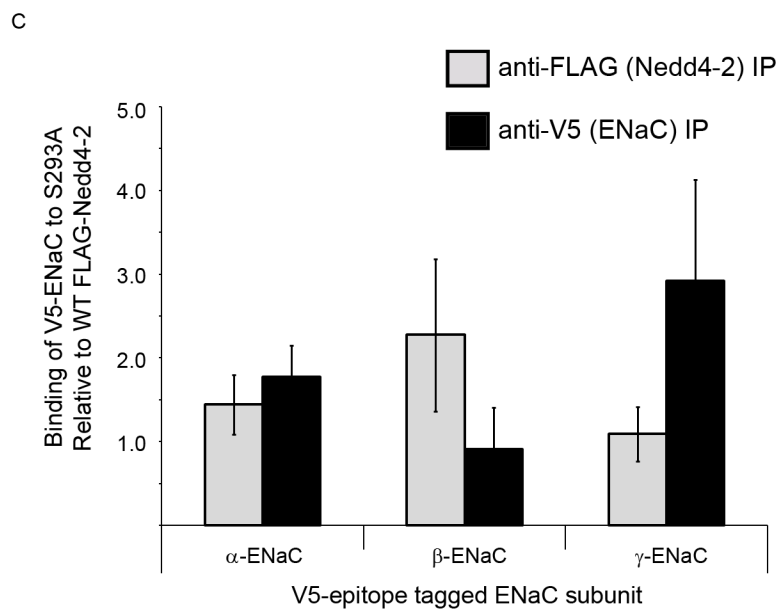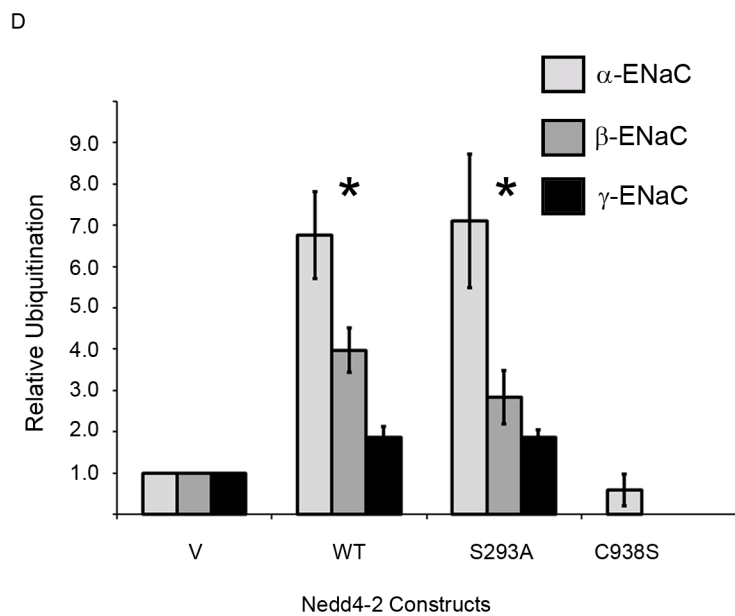

## Supplementary Figure 3

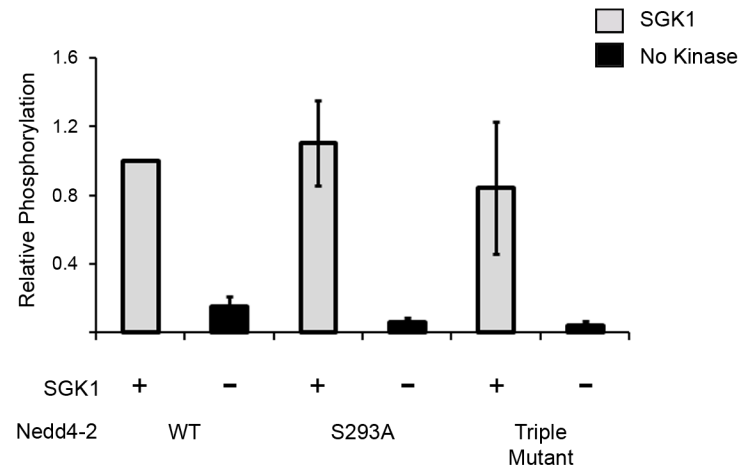

## Supplementary Figure 4

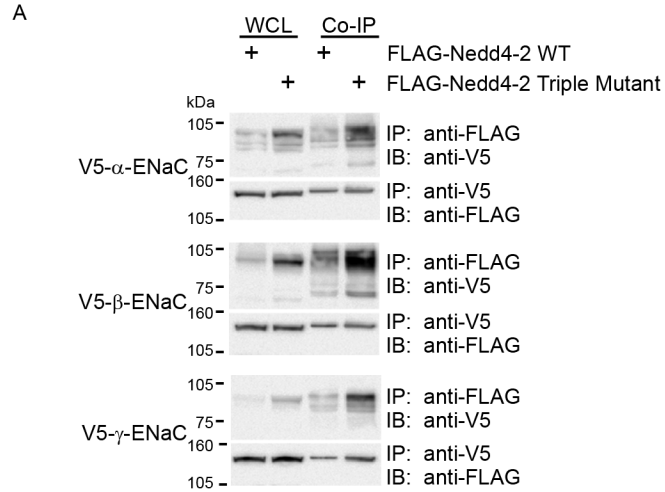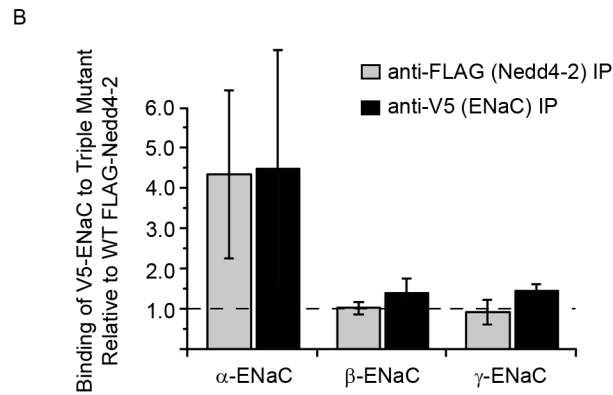

# Supplementary Figure 5
